# Supplementary material for: GenePANDA—a novel network-based gene prioritizing tool for complex diseases
Source: PubMed Central journal article supplement (PMC5333103; doi:10.1038/srep43258), 2017-03-02
Supplement: srep43258-s1.pdf [file srep43258-s1.pdf]

# GenePANDA—a novel network-based gene prioritizing tool for complex diseases

Tianshu Yin<sup>1,2</sup>, Shu Chen<sup>1,3</sup>, Xiaohui Wu<sup>1,3</sup>, Weidong Tian<sup>1,2\*</sup>

Authors' affiliations:

<sup>1</sup>State Key Laboratory of Genetic Engineering and Collaborative Innovation Center for Genetics and Development, School of Life Sciences, Fudan University, Shanghai 200436, P.R. China

<sup>2</sup>Department of Biostatistics and Computational Biology, School of Life Sciences, Fudan University, Shanghai 200436, P.R. China

<sup>3</sup>National Center for International Research of Development and Disease, Institute of Developmental Biology and Molecular Medicine, Fudan University, Shanghai 200433, P. R. China

\*Corresponding Authors

Email:

Tianshu Yin: [tsyin10@fudan.edu.cn](mailto:tsyin10@fudan.edu.cn)

Shu Chen: [chenshu@fudan.edu.cn](mailto:chenshu@fudan.edu.cn)

Xiaohui Wu: [xiaohui\\_wu@fudan.edu.cn](mailto:xiaohui_wu@fudan.edu.cn)

Weidong Tian: [weidong.tian@fudan.edu.cn](mailto:weidong.tian@fudan.edu.cn) (Corresponding author)

## Supplementary Table S1

| Top 10 predicted genes whose association with obesity have been reported recently |      |                                            |
|-----------------------------------------------------------------------------------|------|--------------------------------------------|
| Gene                                                                              | Rank | Literature Experimental Evidence Pubmed ID |
| GCG                                                                               | 1    | 26186884                                   |
| GAL                                                                               | 2    | 26172564                                   |
| SST                                                                               | 3    | 25956467                                   |
| KNG1                                                                              | 4    | NA                                         |
| CPB2                                                                              | 5    | NA                                         |
| GCK                                                                               | 6    | 26132169                                   |
| LEPR                                                                              | 7    | 26365669                                   |
| IAPP                                                                              | 8    | 26398307                                   |
| PPY                                                                               | 9    | 26612764                                   |

| PNPLA2                                                                                  | 10   | 26500201                                   |
|-----------------------------------------------------------------------------------------|------|--------------------------------------------|
| Top 10 predicted genes whose association with diabetes have been reported recently      |      |                                            |
| Gene                                                                                    | Rank | Literature Experimental Evidence Pubmed ID |
| PRO2044                                                                                 | 1    | NA                                         |
| POMC                                                                                    | 2    | 26930171                                   |
| NOS3                                                                                    | 3    | 25477161                                   |
| PRL                                                                                     | 4    | 26299069                                   |
| TTR                                                                                     | 5    | 25781688                                   |
| SST                                                                                     | 6    | 26589890                                   |
| TGFBI                                                                                   | 7    | 24728038                                   |
| SCARB2                                                                                  | 8    | NA                                         |
| AGT                                                                                     | 9    | 26380312                                   |
| REN                                                                                     | 10   | 26569322                                   |
| Top 10 predicted genes whose association with breast cancer have been reported recently |      |                                            |
| Gene                                                                                    | Rank | Literature Experimental Evidence Pubmed ID |
| POLD1                                                                                   | 1    | 27022290                                   |
| BIRC5                                                                                   | 2    | 26372358                                   |
| FOS                                                                                     | 3    | 26536102                                   |
| RFC5                                                                                    | 4    | NA                                         |
| ATR                                                                                     | 5    | 26319584                                   |
| CHK2                                                                                    | 6    | 26025911                                   |
| RFC4                                                                                    | 7    | NA                                         |
| RFC3                                                                                    | 8    | NA                                         |
| SP1                                                                                     | 9    | 26645832                                   |
| GADD45B                                                                                 | 10   | 25840970                                   |

**Supplementary Table S2**

| Rank Ratio of 42 Novel Associations by 4 Methods |        |              |          |           |
|--------------------------------------------------|--------|--------------|----------|-----------|
|                                                  | Candid | Endeavour-GW | Pinta-GW | GenePANDA |
| ACAD9                                            | 33.45  | 1.53         | 31.53    | 8.14      |
| ATF7IP                                           | 1.38   | 49.88        | 58.21    | 35.48     |
| BCL3                                             | 60.27  | 4.74         | 10.76    | 9.89      |
| BRCA2                                            | 1.37   | 1.25         | 0.29     | 8.50      |
| C20orf54                                         | 67.5   | 95.54        | 95.04    | 0.17      |
| CD320                                            | 80.54  | 46.95        | 26.41    | 0.05      |
| CHST14                                           | 61.64  | 7.57         | 25.8     | 0.26      |
| CRHR1                                            | 15.04  | 13.35        | 12.94    | 11.87     |
| CSF1R                                            | 2.93   | 1.67         | 2.69     | 2.65      |

|          |       |       |       |       |
|----------|-------|-------|-------|-------|
| DAB2IP   | 14.2  | 26.4  | 21.03 | 26.80 |
| DISP1    | 2.26  | 32.85 | 93.23 | 7.23  |
| DMRT1    | 41.83 | 79.04 | 29.94 | 8.76  |
| EZH2     | 4.66  | 34.43 | 23.41 | 4.69  |
| FUT2     | 47.67 | 42.43 | 19.74 | 14.30 |
| G6PC3    | 47.72 | 18.72 | 51.22 | 71.53 |
| GABRR1   | 17.43 | 15.97 | 11.75 | 12.66 |
| GLIS3    | 7.92  | 2.25  | 0.76  | 29.54 |
| HCCS     | 25.85 | 2.75  | 10.78 | 89.21 |
| HTR7     | 17.7  | 0.56  | 1.73  | 5.18  |
| IFNG     | 47.19 | 1.21  | 0.21  | 0.16  |
| IL10     | 13.22 | 26.26 | 0.18  | 0.24  |
| LPP      | 74.55 | 6.93  | 17.62 | 2.87  |
| MECOM    | 11.6  | 15.89 | 30.24 | 11.71 |
| MMEL1    | 25.2  | 39.37 | 18.32 | 6.49  |
| PLCE1    | 10.45 | 13.03 | 42.6  | 13.04 |
| PQBP1    | 22.51 | 16.74 | 34.79 | 83.61 |
| RANBP1   | 7.32  | 46.07 | 48.2  | 91.66 |
| RUNX2    | 1.79  | 3.07  | 0.18  | 0.11  |
| SDCCAG8  | 78.11 | 5.23  | 0.85  | 0.12  |
| SH2B1    | 3.53  | 10.82 | 12.64 | 12.02 |
| SOX17    | 74.67 | 15.08 | 1.11  | 1.82  |
| SPIB     | 5.56  | 10.28 | 30.44 | 24.71 |
| STOM     | 26.54 | 6.52  | 22.72 | 22.06 |
| TBX2     | 31.34 | 1.87  | 1.34  | 1.87  |
| TNFRSF19 | 5.74  | 36.09 | 21.24 | 10.81 |
| TP63     | 7.04  | 1.35  | 11.67 | 5.50  |
| TRAF3IP2 | 2.05  | 39.04 | 23.1  | 9.69  |
| TRAF6    | 0.13  | 16.54 | 8.11  | 1.81  |
| UBE2E2   | 51.18 | 17.38 | 61.89 | 69.03 |
| UBE2L3   | 49.17 | 71.21 | 6.34  | 33.65 |
| UTRN     | 18.51 | 0.46  | 2.99  | 1.08  |
| WDR62    | 29.98 | 23.35 | 63.97 | 0.01  |

**Supplementary Figure S1**

### All 196 Complex Diseases

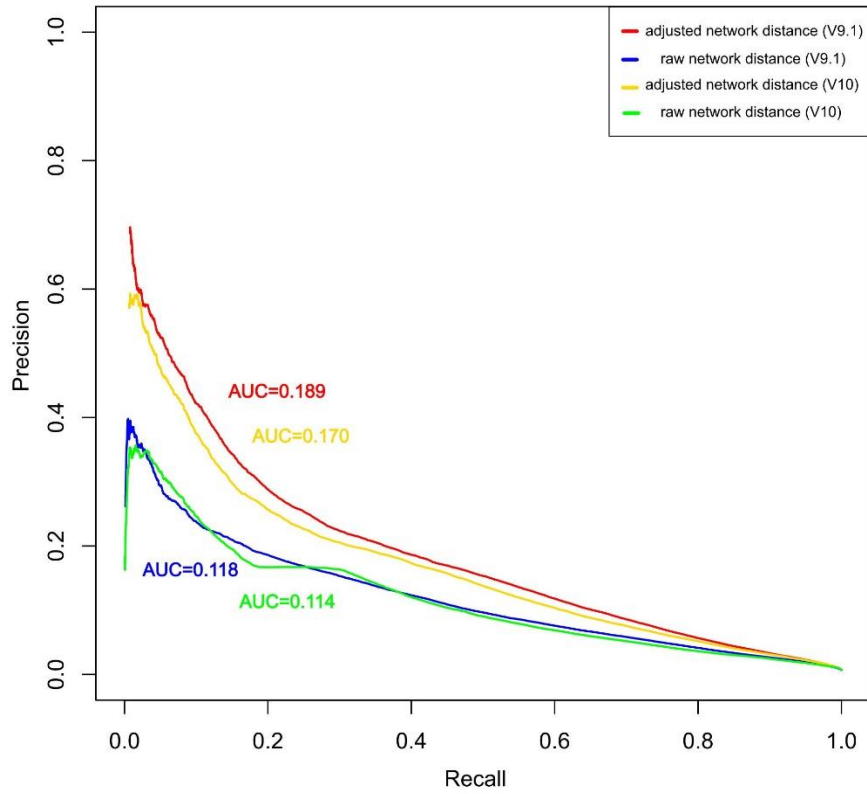

**Supplementary Figure S1:** Prediction performance of GenePANDA on 196 diseases on adjusted and raw network distance based on STRING v9.1 and STRING v10.
